# Supplementary material for: Genome Sequencing and Analysis of the Tasmanian Devil and Its Transmissible Cancer
Source: PubMed Central journal article supplement (PMC3281993; doi:10.1016/j.cell.2011.11.065), 2012-02-17
Supplement: mmc1.pdf [file mmc1.pdf]

Cell, Volume 148

## Supplemental Information

### Genome Sequencing and Analysis

#### of the Tasmanian Devil

#### and Its Transmissible Cancer

Elizabeth P. Murchison, Ole B. Schulz-Trieglaff, Zemin Ning, Ludmil B. Alexandrov, Markus J. Bauer, Beiyuan Fu, Matthew Hims, Zhihao Ding, Sergii Ivakhno, Caitlin Stewart, Bee Ling Ng, Wendy Wong, Bronwen Aken, Simon White, Amber Alsop, Jennifer Becq, Graham R. Bignell, R. Keira Cheetham, William Cheng, Thomas R. Connor, Anthony J. Cox, Zhi-Ping Feng, Yong Gu, Russell J. Grocock, Simon R. Harris, Irina Khrebtukova, Zoya Kingsbury, Mark Kowarsky, Alexandre Kreiss, Shujun Luo, John Marshall, David J. McBride, Lisa Murray, Anne-Maree Pearse, Keiran Raine, Isabelle Rasolonjatovo, Richard Shaw, Philip Tedder, Carolyn Tregidgo, Albert J. Vilella, David C. Wedge, Gregory M. Woods, Niall Gormley, Sean Humphray, Gary Schroth, Geoffrey Smith, Kevin Hall, Stephen M.J. Searle, Nigel P. Carter, Anthony T. Papenfuss, P. Andrew Futreal, Peter J. Campbell, Fengtang Yang, David R. Bentley, Dirk J. Evers, and Michael R. Stratton

Table S1. Tasmanian Devil Genome Size Estimation, Related to Table 1

| Method                                   | Estimated Tasmanian devil genome size (Gb) |
|------------------------------------------|--------------------------------------------|
| Number of assembled bases (contigs)      | 2.93                                       |
| Number of assembled bases (supercontigs) | 3.17                                       |
| Kmer frequency analysis                  | 3.03                                       |
| Flow karyotype analysis                  | 2.89                                       |
| Relative DNA content analysis            | 2.92                                       |

**Table S2. *In Silico* Chromosome Assignment , Related to Table 1**

| <b>Chromosome</b> | <b>Chromosome DNA content (cytogenetics) (Mb)</b> | <b>Number of assigned supercontigs</b>                              | <b>Assigned bases (Mb)</b>                            |
|-------------------|---------------------------------------------------|---------------------------------------------------------------------|-------------------------------------------------------|
| 1                 | 571                                               | 6729                                                                | 684                                                   |
| 2                 | 610                                               | 8381                                                                | 740                                                   |
| 3                 | 556                                               | 7197                                                                | 641                                                   |
| 4                 | 450                                               | 4817                                                                | 487                                                   |
| 5                 | 341                                               | 3188                                                                | 300                                                   |
| 6                 | 277                                               | 2844                                                                | 263                                                   |
| X                 | 122                                               | 2378                                                                | 86.6                                                  |
| Unassigned        |                                                   | (440)                                                               | (1.23)                                                |
| Total             | 2927                                              | 35,974 (total supercontigs)<br>35,534 (total assigned supercontigs) | 3202.8 (Total bases)<br>3201.6 (Total assigned bases) |

**Table S3. Coordinates of Tumour-Specific Rearrangements, Related to Figure 4**

The rearrangements listed were identified and confirmed only in 87T or 53T but not in both tumours.

| <b>Sample</b> | <b>Breakpoint 1</b>                            |               | <b>Breakpoint 2</b>                            |               |
|---------------|------------------------------------------------|---------------|------------------------------------------------|---------------|
| <b>87T</b>    | <b>Coordinate range</b>                        | <b>Strand</b> | <b>Coordinate range</b>                        | <b>Strand</b> |
|               | Chr4_supercontig_000000294:<br>363864-364141   | -             | Chr4_supercontig_000000294:<br>285688-285971   | +             |
|               | Chr3_supercontig_000000393:<br>1780799-1781083 | -             | Chr3_supercontig_000000281:<br>21827-22022     | -             |
|               | Chr3_supercontig_000001556:<br>850-1120        | -             | Chr3_supercontig_000000315:<br>147673-147969   | +             |
|               | Chr5_supercontig_000003149:<br>550-825         | +             | Chr2_supercontig_000001430:<br>157997-158230   | +             |
|               | Chr4_supercontig_000000654:2<br>4128-24412     | +             | Chr4_supercontig_000000229:<br>2437030-2437307 | +             |
|               | Chr2_supercontig_000000207:1<br>235093-1235312 | -             | Chr2_supercontig_000000207:<br>1230368-1230615 | +             |
|               | Chr1_supercontig_000000629:<br>186664-186891   | -             | Chr1_supercontig_000000629:<br>185915-186201   | +             |
|               | Chr2_supercontig_000000207:<br>1218849-1219055 | -             | Chr2_supercontig_000000207:<br>1214688-1214894 | +             |
|               | Chr2_supercontig_000000207:<br>1336201-1336430 | +             | Chr2_supercontig_000000207:<br>1335745-1336030 | +             |
|               | Chr2_supercontig_000000344:<br>674461-674728   | -             | Chr2_supercontig_000000344:<br>672331-672615   | -             |
|               | Chr1_supercontig_000000182:<br>1304512-1304801 | +             | Chr1_supercontig_000000182:<br>1303661-1303939 | +             |
|               |                                                |               |                                                |               |
|               |                                                |               |                                                |               |
| <b>53T</b>    | <b>Coordinate range</b>                        | <b>Strand</b> | <b>Coordinate range</b>                        | <b>Strand</b> |
|               | Chr3_supercontig_000000191:<br>233670-233926   | -             | Chr1_supercontig_000000303:<br>3376378-3376658 | -             |
|               | Chr2_supercontig_000000364:<br>1366493-1366808 | +             | Chr2_supercontig_000000017:<br>367364-367641   | -             |
|               | Chr5_supercontig_000001108:<br>870-1177        | -             | Chr1_supercontig_000001069:<br>40054-40331     | -             |
|               | Chr1_supercontig_000000253:<br>91816-92089     | -             | Chr1_supercontig_000000253:<br>89326-89611     | +             |
|               | Chrx_supercontig_000000022:<br>31467-31764     | +             | Chrx_supercontig_000000022:<br>21372-21685     | -             |
|               | Chr2_supercontig_000000274:<br>784350-784641   | -             | Chr2_supercontig_000000274:<br>739815-740095   | +             |
|               | Chr3_supercontig_000000130:<br>1756277-1756562 | -             | Chr3_supercontig_000000130:<br>1749479-1749756 | +             |
|               | Chr1_supercontig_000000356:<br>1345071-1345388 | -             | Chr1_supercontig_000000101:<br>1147092-1147437 | -             |

|  |                                                |   |                                                |   |
|--|------------------------------------------------|---|------------------------------------------------|---|
|  | Chr5_supercontig_000000097:<br>125064-125382   | + | Chr3_supercontig_000000190:<br>1609202-1609504 | - |
|  | Chr2_supercontig_000001667:<br>152094-152382   | + | Chr2_supercontig_000000584:<br>111379-111671   | + |
|  | Chr3_supercontig_000000115:<br>261665-261938   | - | Chr3_supercontig_000000115:<br>260047-260297   | + |
|  | Chr1_supercontig_000000104:<br>1148801-1149123 | - | Chr1_supercontig_000000104:<br>1145329-1145615 | + |
|  | Chr5_supercontig_000000152:<br>1991912-1992185 | - | Chr2_supercontig_000000061:<br>2384483-2384759 | - |
|  | Chr5_supercontig_000000350:<br>74757-75032     | - | Chr5_supercontig_000000350:<br>38473-38804     | + |
|  | Chr3_supercontig_000000377:<br>2627634-2627909 | - | Chr3_supercontig_000000377:<br>2622358-2622613 | + |
|  | Chr3_supercontig_000000401:<br>151726-151992   | + | Chr3_supercontig_000000393:<br>3853491-3853755 | - |
|  | Chr2_supercontig_000000345:<br>100261-100543   | + | Chr2_supercontig_000000014:<br>1392972-1393238 | + |

**Table S4. Variation Involving Genes in DFTD, Related to Figure 4**

Table is available as an attached Excel spreadsheet.

(A) Non-synonymous single base substitutions in gene exons in 87T and 53T. These variants were found in 87T and 53T but not in either of the normal Tasmanian devil genomes.

(B) Non-synonymous single base substitutions in gene exons in 87T. Variants were found only in 87T but not in 53T or either of the normal Tasmanian devil genomes.

(C) Non-synonymous single base substitutions in gene exons in 53T. Variants were found only in 53T but not in 87T or either of the normal Tasmanian devil genomes.

(D) Indels in gene exons in 87T and 53T. Variants were found in both 87T and 53T or either 87T or 53T but not in either of the normal Tasmanian devil genomes.

(E) Structural variants involving genes in DFTD. Coordinates and gene IDs are listed for structural variants involving genes that were identified in both 87T and 53T but not in either of the normal Tasmanian devil genomes. As confirmation has not been performed for the whole set, this list may include some false positives.

**Table S5. Genotyping Summary, Related to Figure 5**

The genotypes that define the coloured symbols on the phylogenetic trees in Figure 5 and Figure S4 are shown. The mitochondrial coordinates are based on DDBJ/EMBL/GenBank accession JN216828.

| Symbol                                                                              | Genotype                                                                                                                                                                                                                                                                                                                                                                                                          | Type                                                                                                                                                                                       |
|-------------------------------------------------------------------------------------|-------------------------------------------------------------------------------------------------------------------------------------------------------------------------------------------------------------------------------------------------------------------------------------------------------------------------------------------------------------------------------------------------------------------|--------------------------------------------------------------------------------------------------------------------------------------------------------------------------------------------|
|    | Probable ancestral genotype.                                                                                                                                                                                                                                                                                                                                                                                      |                                                                                                                                                                                            |
|    | Chr1_supercontig_000000134:1378535C>T                                                                                                                                                                                                                                                                                                                                                                             | Heterozygous                                                                                                                                                                               |
|    | Chr3_supercontig_000000336:2001045T><br>Chr1_supercontig_000000248:697762G>A<br>Chr1_supercontig_000000134:1378535C>T                                                                                                                                                                                                                                                                                             | Heterozygous loss<br>Heterozygous<br>Heterozygous                                                                                                                                          |
|    | Chr3_supercontig_000000336:2001045T><br>Chr2_supercontig_000000158:601261C>T<br>Chr1_supercontig_000000095:2618076T>G<br>Chr1_supercontig_000000248:697762G>A<br>Chr1_supercontig_000000134:1378535C>T<br>MT:1828A>G<br>MT:3255G>A                                                                                                                                                                                | Heterozygous loss<br>Heterozygous<br>Homozygous<br>Homozygous<br>Heterozygous<br>Mitochondrial<br>Mitochondrial                                                                            |
|    | Chr3_supercontig_000000336:2001045T><br>Chr2_supercontig_000000158:601261C>T<br>Chr1_supercontig_000000095:2618076T>G<br>Chr1_supercontig_000000248:697762G>A<br>Chr1_supercontig_000000134:1378535C>T<br>MT:1828A>G<br>MT:1928T>C<br>MT:3255G>A                                                                                                                                                                  | Heterozygous loss<br>Heterozygous<br>Homozygous<br>Homozygous<br>Heterozygous<br>Mitochondrial<br>Mitochondrial<br>Mitochondrial                                                           |
|    | Chr3_supercontig_000000336:2001045T><br>Chr2_supercontig_000000158:601261C>T<br>Chr1_supercontig_000000095:2618076T>G<br>Chr1_supercontig_000000248:697762G>A<br>Chr1_supercontig_000000248:403816C>T<br>Chr1_supercontig_000000134:1378535C>T<br>MT:1828A>G<br>MT:3255G>A                                                                                                                                        | Heterozygous loss<br>Heterozygous<br>Homozygous<br>Homozygous<br>Homozygous<br>Homozygous<br>Mitochondrial<br>Mitochondrial                                                                |
|  | Chr3_supercontig_000000336:2001045T><br>Chr2_supercontig_000000158:601261C>T<br>Chr1_supercontig_000000095:2618076T>G<br>Chr1_supercontig_000000248:697762G>A<br>Chr4_supercontig_000000200:4423976T>C<br>Chr3_supercontig_000000295:352495G>A<br>Chr3_supercontig_000000362:528865A>G<br>Chr1_supercontig_000000248:403816C>T<br>Chr1_supercontig_000000134:1378535C>T<br>MT:1828A>G<br>MT:3255G>A<br>MT:2572G>A | Heterozygous loss<br>Heterozygous<br>Homozygous<br>Homozygous<br>Heterozygous<br>Homozygous<br>Homozygous<br>Heterozygous<br>Homozygous<br>Mitochondrial<br>Mitochondrial<br>Mitochondrial |
|  | Chr3_supercontig_000000336:2001045T><br>Chr2_supercontig_000000158:601261C>T<br>Chr1_supercontig_000000095:2618076T>G<br>Chr1_supercontig_000000248:697762G>A<br>Chr1_supercontig_000000134:1378535C>T<br>MT:1828A>G<br>MT:3430T>A<br>MT:4311G>A<br>MT:3255G>A                                                                                                                                                    | Heterozygous loss<br>Heterozygous<br>Homozygous<br>Heterozygous<br>Heterozygous<br>Mitochondrial<br>Mitochondrial<br>Mitochondrial<br>Mitochondrial                                        |
|  | Chr3_supercontig_000000336:2001045T><br>Chr2_supercontig_000000158:601261C>T<br>Chr1_supercontig_000000095:2618076T>G<br>Chr1_supercontig_000000248:697762G>A<br>Chr1_supercontig_000000134:1378535C>T<br>MT:1828A>G<br>MT:2731A>G<br>MT:3430T>A                                                                                                                                                                  | Heterozygous loss<br>Heterozygous<br>Homozygous<br>Homozygous<br>Heterozygous<br>Mitochondrial<br>Mitochondrial<br>Mitochondrial                                                           |

|                                                                                    |                                                                                                                                                                                                                                                                                                                                                                                                                                 |                                                                                                                                                                                                             |
|------------------------------------------------------------------------------------|---------------------------------------------------------------------------------------------------------------------------------------------------------------------------------------------------------------------------------------------------------------------------------------------------------------------------------------------------------------------------------------------------------------------------------|-------------------------------------------------------------------------------------------------------------------------------------------------------------------------------------------------------------|
|                                                                                    | MT:4311G>A<br>MT:3255G>A                                                                                                                                                                                                                                                                                                                                                                                                        | Mitochondrial<br>Mitochondrial                                                                                                                                                                              |
|   | MT:7198T>C                                                                                                                                                                                                                                                                                                                                                                                                                      | Mitochondrial                                                                                                                                                                                               |
|   | MT:12288C>T<br>MT:7198T>C                                                                                                                                                                                                                                                                                                                                                                                                       | Mitochondrial<br>Mitochondrial                                                                                                                                                                              |
|   | MT:3161G>A                                                                                                                                                                                                                                                                                                                                                                                                                      | Mitochondrial                                                                                                                                                                                               |
|   | MT:3161G>A<br>MT:14209A>T                                                                                                                                                                                                                                                                                                                                                                                                       | Mitochondrial                                                                                                                                                                                               |
|   | MT:2707G>A                                                                                                                                                                                                                                                                                                                                                                                                                      | Mitochondrial                                                                                                                                                                                               |
|   | MT:2707G>A<br>MT:3679G>A                                                                                                                                                                                                                                                                                                                                                                                                        | Mitochondrial                                                                                                                                                                                               |
|   | MT:6745T>C                                                                                                                                                                                                                                                                                                                                                                                                                      | Mitochondrial                                                                                                                                                                                               |
|   | MT:14114C>T                                                                                                                                                                                                                                                                                                                                                                                                                     | Mitochondrial                                                                                                                                                                                               |
|   | MT:2942C>T                                                                                                                                                                                                                                                                                                                                                                                                                      | Mitochondrial                                                                                                                                                                                               |
|   | MT:4266G>A                                                                                                                                                                                                                                                                                                                                                                                                                      | Mitochondrial                                                                                                                                                                                               |
|   | MT:2261T>C                                                                                                                                                                                                                                                                                                                                                                                                                      | Mitochondrial                                                                                                                                                                                               |
|   | Chr1_supercontig_000000095:591062C>A<br>Chr2_supercontig_000000205:1697548C>T<br>Chr1_supercontig_000000246:95466A>G<br>Chr2_supercontig_000000205:4043679A>T                                                                                                                                                                                                                                                                   | Homozygous<br>Homozygous<br>Homozygous<br>Homozygous                                                                                                                                                        |
|   | Chr1_supercontig_000000095:591062C>A<br>Chr2_supercontig_000000205:1697548C>T<br>Chr1_supercontig_000000246:95466A>G<br>Chr2_supercontig_000000205:4043679A>T<br>MT:10133C>T                                                                                                                                                                                                                                                    | Homozygous<br>Homozygous<br>Homozygous<br>Homozygous<br>Mitochondrial                                                                                                                                       |
|   | Chr3_supercontig_000000336:2001045T>-<br>Chr2_supercontig_000000158:601261C>T<br>Chr1_supercontig_000000095:2618076T>G<br>Chr1_supercontig_000000248:697762G>A<br>Chr4_supercontig_000000200:4423976T>C<br>Chr3_supercontig_000000295:352495G>A<br>Chr3_supercontig_000000362:528865A>G<br>Chr1_supercontig_000000248:403816C>T<br>Chr1_supercontig_000000134:1378535C>T<br>MT:1828A>G<br>MT:3255G>A<br>MT:2572G>A<br>MT:611C>T | Heterozygous loss<br>Heterozygous<br>Homozygous<br>Homozygous<br>Heterozygous<br>Homozygous<br>Homozygous<br>Heterozygous<br>Homozygous<br>Mitochondrial<br>Mitochondrial<br>Mitochondrial<br>Mitochondrial |
|   | Chr3_supercontig_000000336:2001045T>-<br>Chr2_supercontig_000000158:601261C>T<br>Chr1_supercontig_000000095:2618076T>G<br>Chr1_supercontig_000000248:697762G>A<br>Chr1_supercontig_000000134:1378535C>T<br>MT:1828A>G<br>MT:3255G>A<br>MT:4422G>A                                                                                                                                                                               | Heterozygous loss<br>Heterozygous<br>Homozygous<br>Homozygous<br>Heterozygous<br>Mitochondrial<br>Mitochondrial<br>Mitochondrial                                                                            |
|  | Chr1_supercontig_000000095:591062C>A<br>Chr2_supercontig_000000205:1697548C>T<br>Chr1_supercontig_000000246:95466A>G<br>Chr2_supercontig_000000205:4043679A>T<br>MT:10133C>T<br>Chr2_supercontig_000000031:817867C>T                                                                                                                                                                                                            | Homozygous<br>Homozygous<br>Homozygous<br>Homozygous<br>Mitochondrial<br>Heterozygous                                                                                                                       |
